# Supplementary material for: Gaining insight into the neural basis of resting-state fMRI signal
Source: PubMed Central journal article supplement — Neuroimage. Author manuscript; Available in PMC 2022 Apr 15. (PMC8935501; doi:10.1016/j.neuroimage.2022.118960), 2022-02-01
Supplement: NIHMS1785793-supplement-1.pdf [file NIHMS1785793-supplement-1.pdf]

## Supplementary Information

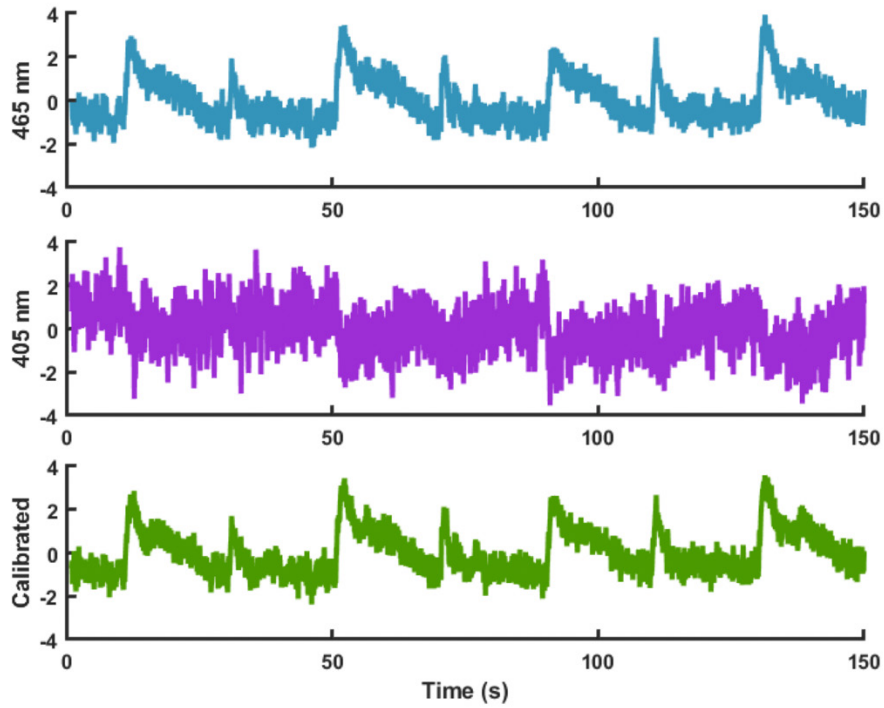

**Figure S1:** Stimulus-evoked GCaMP based fiber photometry recording. Representative stimulus-evoked signals in 465nm (top) and 405nm (middle) channels and calibrated calcium signal (bottom) by regressing the 405 nm signal from the 465nm signal.

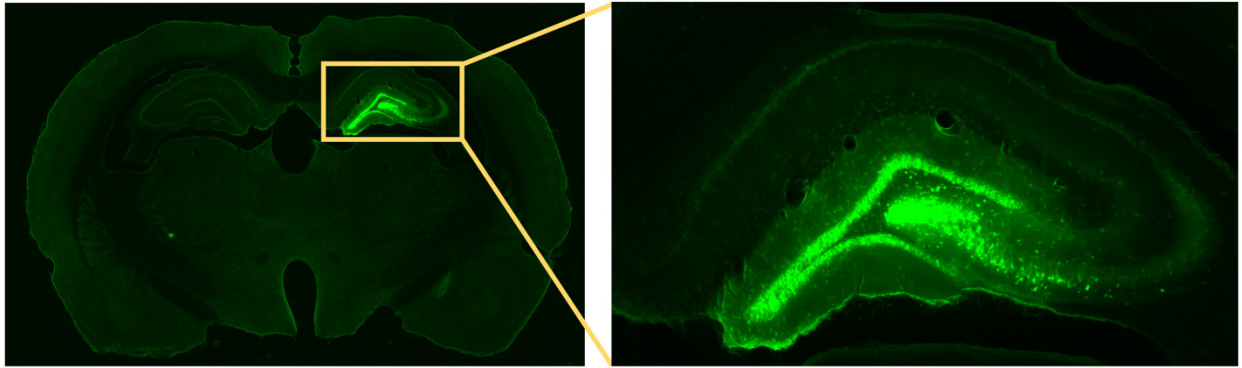

**Figure S2:** Histological characterization of GCaMP6s protein expression.

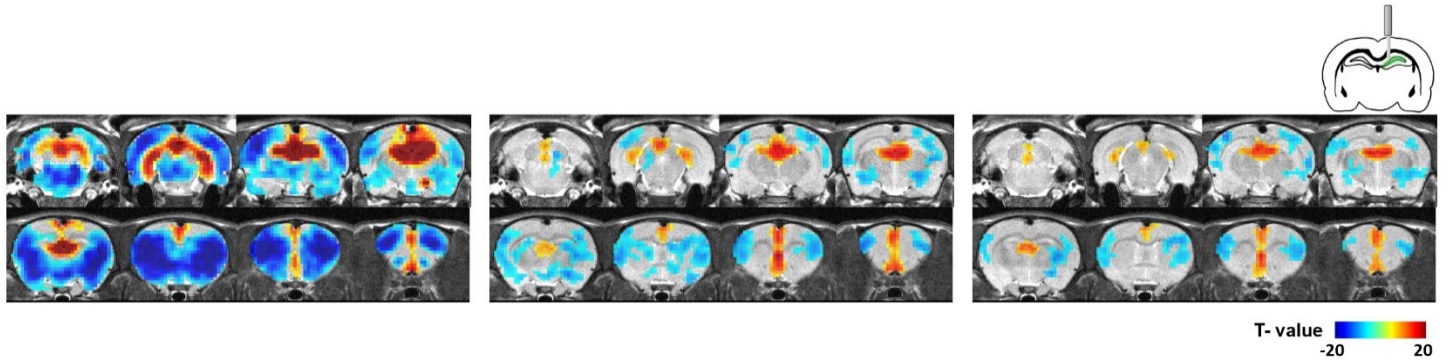

**Figure S3.** Thresholded t-maps of (left) BOLD-driven RSFC, (mid) calcium-triggered RSFC, and (right) spike event-triggered RSFC of the dHP.  $P < 0.05$ , FDR corrected.

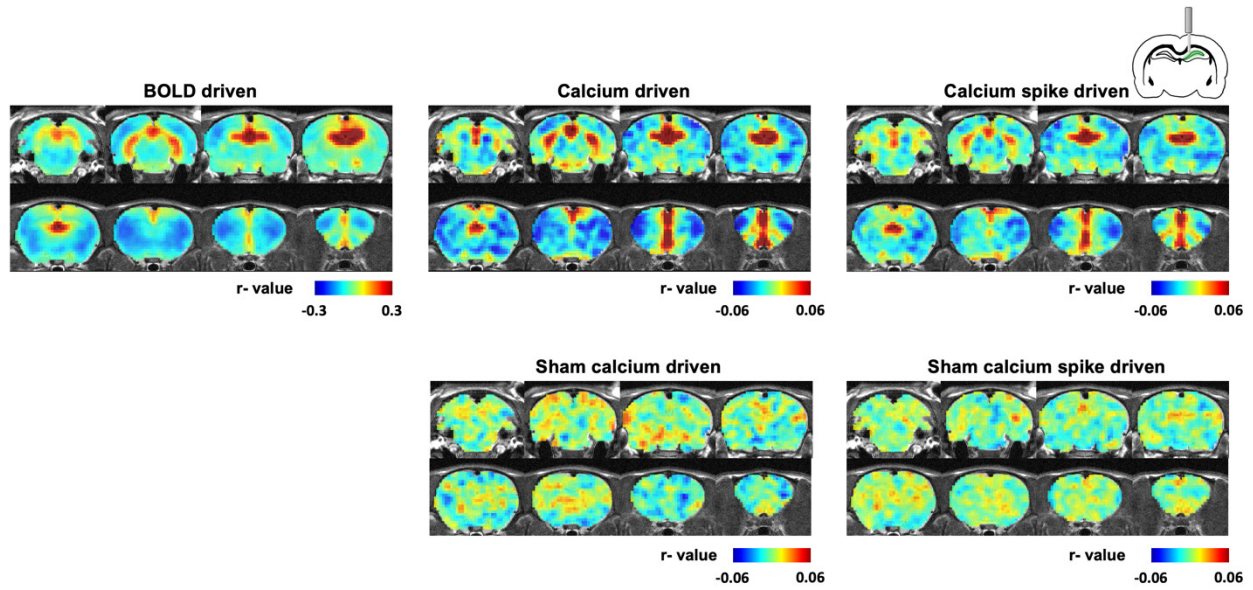

**Figure S4.** Spatial correlation maps generated using (top left) acquired dHP BOLD signal, (top middle) calcium-predicted BOLD signal, (top right) spike train-predicted BOLD signal, (bottom middle) sham calcium-predicted BOLD signal, and (bottom right) sham calcium spike train-predicted BOLD signal.
